# Supplementary material
Source: publisher site journal article supplement (https://www.dovepress.com/article/348143)
Supplement: Supplementary file 1 [file get_supplementary_file.php]

## SUPPORTING INFORMATION

**Table 1. Overview of the short-term studies**

|                      | <b>Study</b>                            | <b>Treatment Arms</b>                                                                               | <b>Dosing</b>  | <b>No. of Patients<sup>a</sup></b> | <b>Normal Prolactin Range<sup>b</sup></b> |
|----------------------|-----------------------------------------|-----------------------------------------------------------------------------------------------------|----------------|------------------------------------|-------------------------------------------|
| <i>Schizophrenia</i> | RGH-MD-03<br>(NCT00404573)              | Placebo<br>Cariprazine 1.5–4.5 mg/d<br>Cariprazine 6–12 mg/d                                        | Flexible       | 129<br>127<br>133                  | Male: ≤17 ng/mL<br>Female ≤25 ng/mL       |
|                      | RGH-MD-04 <sup>c</sup><br>(NCT01104766) | Placebo<br>Cariprazine 3 mg/d<br>Cariprazine 6 mg/d<br>Aripiprazole 10 mg/d                         | Fixed          | 153<br>155<br>157<br>152           | Male: ≤20 ng/mL<br>Female: ≤29 ng/mL      |
|                      | RGH-MD-05<br>(NCT01104779)              | Placebo<br>Cariprazine 3–6 mg/d<br>Cariprazine 6–9 mg/d                                             | Fixed/Flexible | 147<br>151<br>148                  | Male: ≤20 ng/mL<br>Female: ≤29 ng/mL      |
|                      | RGH-MD-16 <sup>c</sup><br>(NCT00694707) | Placebo<br>Cariprazine 1.5 mg/d<br>Cariprazine 3 mg/d<br>Cariprazine 4.5 mg/d<br>Risperidone 4 mg/d | Fixed          | 151<br>145<br>146<br>147<br>140    | Male: ≤20 ng/mL<br>Female: ≤29 ng/mL      |
|                      | RGH-MD-31<br>(NCT00488618)              | Placebo<br>Cariprazine 3–12 mg/d                                                                    | Flexible       | 118<br>118                         | Male: ≤20 ng/mL<br>Female ≤29.1 ng/mL     |
|                      | RGH-MD-32<br>(NCT01058096)              | Placebo<br>Cariprazine 3–12 mg/d                                                                    | Flexible       | 154<br>158                         | Male: ≤20 ng/mL<br>Female: ≤29 ng/mL      |
|                      | RGH-MD-33<br>(NCT01058668)              | Placebo<br>Cariprazine 3–6 mg/d<br>Cariprazine 6–12 mg/d                                            | Fixed/Flexible | 161<br>167<br>169                  | Male: ≤17 ng/mL<br>Female ≤25 ng/mL       |
|                      | RGH-MD-53<br>(NCT02670538)              | Placebo<br>Cariprazine 1.5 mg/d<br>Cariprazine 3 mg/g                                               | Fixed          | 165<br>167<br>158                  | Male: ≤24.4 ng/mL<br>Female ≤23.3 ng/mL   |
|                      | RGH-MD-54<br>(NCT02670551)              | Placebo<br>Cariprazine 1.5 mg/d<br>Cariprazine 3 mg/d                                               | Fixed          | 158<br>157<br>165                  | Male: ≤24.4 ng/mL<br>Female ≤23.3 ng/mL   |
|                      | RGH-MD-56<br>(NCT01396447)              | Placebo<br>Cariprazine 0.75 mg/d<br>Cariprazine 1.5 mg/d<br>Cariprazine 3 mg/d                      | Fixed          | 145<br>141<br>146<br>146           | Male: ≤17 ng/mL<br>Female ≤25 ng/mL       |

<sup>a</sup>Safety population (patients who took ≥1 dose of double-blind study drug); <sup>b</sup>Normal ranges for prolactin were pre-defined for each study; <sup>c</sup>Risperidone and aripiprazole were included in RGH-MD-04 and MD-16, respectively, for assay sensitivity.

**Table 2. Overview of the long-term studies**

| <b>Study</b>            | <b>From</b>        | <b>No. of Patients<sup>a</sup></b> | <b>Treatment Duration</b> |
|-------------------------|--------------------|------------------------------------|---------------------------|
| <i>Schizophrenia</i>    |                    |                                    |                           |
| RGH-MD-11 (NCT01104792) | Total              | 586                                | 48 weeks                  |
|                         | MD-04              | 218                                |                           |
|                         | MD-05              | 133                                |                           |
|                         | New Patients       | 235                                |                           |
| RGH-MD-17 (NCT00839852) | Total/MD-16        | 93                                 | 48 weeks                  |
| RGH-MD-06 (NCT01412060) | OL phase           | 765                                | Up to 20 weeks            |
|                         | DB phase           | 200                                | Up to 72 weeks            |
| <i>Bipolar Mania</i>    |                    |                                    |                           |
| RGH-MD-36 (NCT01059539) | Total/New Patients | 402                                | 16 weeks                  |

<sup>a</sup>Safety population (patients who took  $\geq 1$  dose of double-blind study drug).

**Table 3. Demographics (safety population)**

| <b>Characteristic</b>             | <b>Schizophrenia</b>       |                                                 | <b>Bipolar Mania</b>       |                                              | <b>Bipolar Depression</b>  |                                               |
|-----------------------------------|----------------------------|-------------------------------------------------|----------------------------|----------------------------------------------|----------------------------|-----------------------------------------------|
|                                   | <b>Placebo<br/>(n=584)</b> | <b>Cariprazine<br/>1.5–12 mg/d<br/>(n=1317)</b> | <b>Placebo<br/>(n=442)</b> | <b>Cariprazine<br/>3–12 mg/d<br/>(n=623)</b> | <b>Placebo<br/>(n=468)</b> | <b>Cariprazine<br/>1.5–3 mg/d<br/>(n=939)</b> |
| Male, n (%)                       | 415 (71.1)                 | 945 (71.8)                                      | 268 (60.6)                 | 365 (58.6)                                   | 190 (40.6)                 | 357 (38.0)                                    |
| Age, mean (SD), y                 | 37.8 (11.0)                | 37.8 (10.4)                                     | 38.9 (11.6)                | 39.7 (11.7)                                  | 44.0 (12.0)                | 42.4 (11.7)                                   |
| Race, n (%)                       |                            |                                                 |                            |                                              |                            |                                               |
| White                             | 237 (40.6)                 | 574 (43.6)                                      | 203 (45.9)                 | 316 (50.7)                                   | 345 (73.7)                 | 708 (75.4)                                    |
| Black                             | 215 (36.8)                 | 440 (33.4)                                      | 106 (24.0)                 | 165 (26.5)                                   | 112 (23.9)                 | 202 (21.5)                                    |
| Other/Missing                     | 132 (22.6)                 | 303 (23.0)                                      | 133 (30.1)                 | 142 (22.8)                                   | 11 (2.4)                   | 29 (3.1)                                      |
| Weight, mean (SD), kg             | 77.9 (19.8)                | 76.8 (18.6)                                     | 77.4 (19.1)                | 77.3 (18.9)                                  | 86.7 (17.2)                | 86.6 (18.2)                                   |
| BMI, mean (SD), kg/m <sup>2</sup> | 26.4 (5.4)                 | 26.1 (5.3)                                      | 26.9 (5.7)                 | 26.9 (5.6)                                   | 31.3 (6.3)                 | 31.2 (6.6)                                    |

BMI, body mass index; SD, standard deviation.

**Table 4. Shifted categories of prolactin levels in patients with schizophrenia**

| Shift Category                 | Placebo   | Cariprazine Modal Daily Dose |            |           | Risperidone | Aripiprazole |
|--------------------------------|-----------|------------------------------|------------|-----------|-------------|--------------|
|                                |           | 1.5–3 mg/d                   | 4.5–6 mg/d | 9–12 mg/d | 4 mg/d      | 10 mg/d      |
| <i>Normal to 2X and 4X ULN</i> |           |                              |            |           |             |              |
| Male                           |           |                              |            |           |             |              |
| Normal at Baseline, n          | 271       | 219                          | 261        | 105       | 62          | 64           |
| 2X ULN, <sup>a</sup> n (%)     | 0         | 1 (0.5)                      | 1 (0.4)    | 0         | 12 (19.4)   | 0            |
| 4X ULN, <sup>a</sup> n (%)     | 0         | 0                            | 0          | 0         | 0           | 0            |
| Female                         |           |                              |            |           |             |              |
| Normal at Baseline, n          | 80        | 68                           | 67         | 40        | 23          | 22           |
| 2X ULN, <sup>a</sup> n (%)     | 5 (6.3)   | 2 (2.9)                      | 1 (1.5)    | 1 (2.5)   | 14 (60.9)   | 0            |
| 4X ULN, <sup>a</sup> n (%)     | 2 (2.5)   | 1 (1.5)                      | 0          | 0         | 7 (30.4)    | 0            |
| <i>&gt;ULN to Normal</i>       |           |                              |            |           |             |              |
| Male                           |           |                              |            |           |             |              |
| >ULN at Baseline, n            | 93        | 98                           | 112        | 36        | 29          | 27           |
| Normal, <sup>a</sup> n (%)     | 81 (87.1) | 87 (88.8)                    | 102 (91.1) | 33 (91.7) | 4 (13.8)    | 26 (96.3)    |
| Female                         |           |                              |            |           |             |              |
| >ULN at Baseline, n            | 68        | 71                           | 67         | 10        | 16          | 27           |
| Normal, <sup>a</sup> n (%)     | 58 (85.3) | 54 (76.1)                    | 47 (70.2)  | 10 (100)  | 0           | 24 (88.9)    |

<sup>a</sup>At last available double-blind assessment.

ULN, upper limit of normal.

**Table 5. Shifted categories of prolactin levels in patients with bipolar disorder**

| Shift Category                 | Bipolar Mania |                              |           | Bipolar Depression |             |           |
|--------------------------------|---------------|------------------------------|-----------|--------------------|-------------|-----------|
|                                | Placebo       | Cariprazine Modal Daily Dose |           | Placebo            | Cariprazine |           |
|                                |               | 3–6 mg/d                     | 9–12 mg/d |                    | 1.5 mg/d    | 3 mg/d    |
| <i>Normal to 2X and 4X ULN</i> |               |                              |           |                    |             |           |
| Male                           |               |                              |           |                    |             |           |
| Normal at Baseline, n          | 184           | 104                          | 151       | 151                | 142         | 144       |
| 2X ULN, <sup>a</sup> n (%)     | 2 (1.1)       | 1 (1.0)                      | 2 (1.3)   | 0                  | 0           | 0         |
| 4X ULN, <sup>a</sup> n (%)     | 0             | 0                            | 0         | 0                  | 0           | 0         |
| Female                         |               |                              |           |                    |             |           |
| Normal at Baseline, n          | 108           | 75                           | 96        | 220                | 240         | 220       |
| 2X ULN, <sup>a</sup> n (%)     | 1 (0.9)       | 2 (2.7)                      | 0         | 0                  | 2 (0.8)     | 2 (0.9)   |
| 4X ULN, <sup>a</sup> n (%)     | 0             | 1 (1.3)                      | 0         | 0                  | 2 (0.8)     | 0         |
| <i>&gt;ULN to Normal</i>       |               |                              |           |                    |             |           |
| Male                           |               |                              |           |                    |             |           |
| >ULN at Baseline, n            | 53            | 23                           | 45        | 22                 | 9           | 17        |
| Normal, <sup>a</sup> n (%)     | 34 (64.2)     | 18 (78.3)                    | 44 (97.8) | 10 (45.5)          | 7 (77.8)    | 9 (52.9)  |
| Female                         |               |                              |           |                    |             |           |
| >ULN at Baseline, n            | 46            | 27                           | 35        | 30                 | 37          | 33        |
| Normal, <sup>a</sup> n (%)     | 35 (76.1)     | 14 (51.9)                    | 23 (65.7) | 17 (56.7)          | 18 (48.6)   | 19 (57.6) |

<sup>a</sup>At last available double-blind assessment.  
ULN, upper limit of normal.
